# Supplementary material
Source: publisher figshare collection journal article supplement (https://tandf.figshare.com/ndownloader/files/31085241)
Supplement: Supplementary file 1 [file 31085241]

**Piperazine-Grafted Magnetic Reduced Graphene Oxide (Fe3O4@rGO-NH) as a Reusable Heterogeneous Catalyst for Gewald Three-Component Reaction**

Esmail Rezaei-Seresht*, Morteza Bakhshi-Noroozi, Behrooz Maleki

Department of Chemistry, School of Sciences, Hakim Sabzevari University, Sabzevar, Iran

*Corresponding author. Tel.: ++98-51-44013267; Fax: ++98-51-44013365; E-mail: [e.rezaei@hsu.ac.ir](mailto:e.rezaei@hsu.ac.ir)

**Supporting Information**


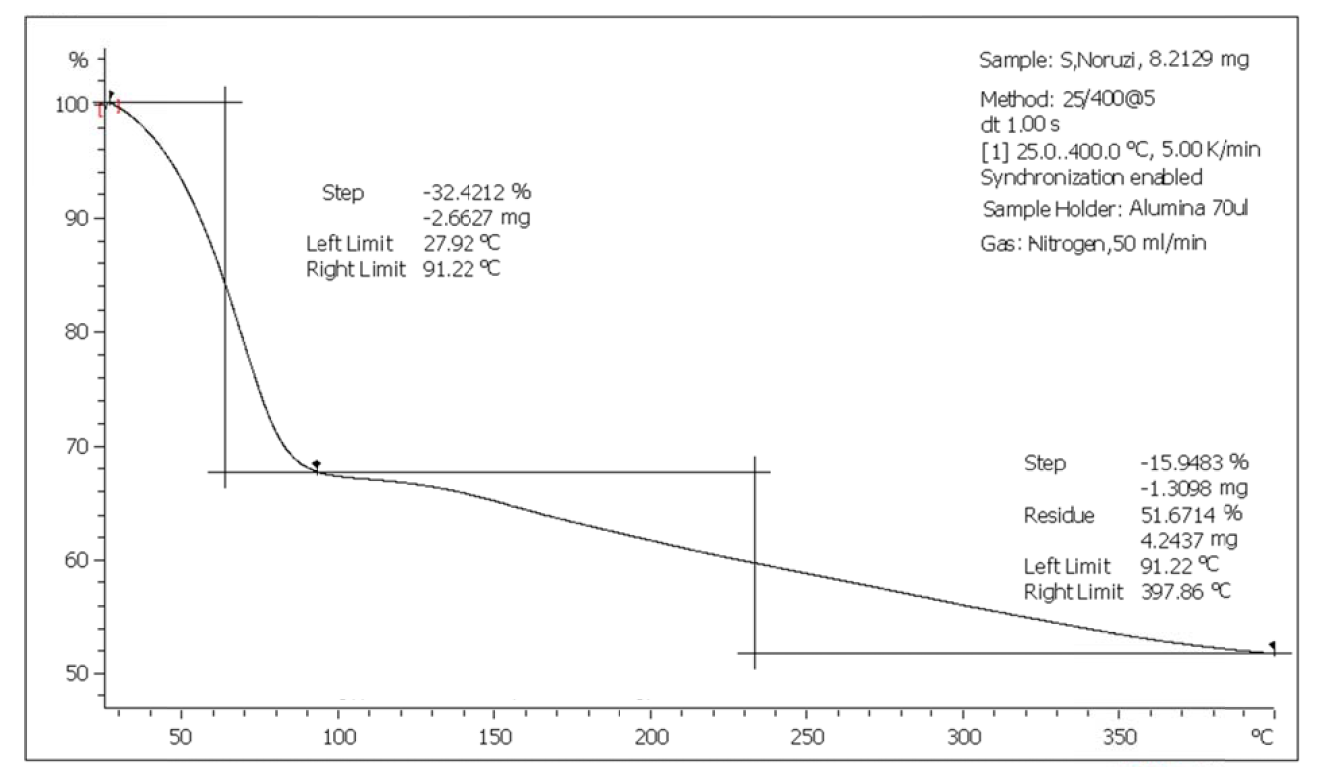


**Figure S1.** TGA curve of catalyst Fe3O4@rGO-NH

**Figure S2.** FT-IR spectrum of catalyst Fe3O4@rGO-NH
